# Supplementary material for: Human Oocyte-Derived Methylation Differences Persist in the Placenta Revealing Widespread Transient Imprinting
Source: PubMed Central journal article supplement (PMC5106035; doi:10.1371/journal.pgen.1006427), 2016-11-11

### A

#### PL 50 - *TMEM17* region

|               |   |   |   |   |   |   |   |
|---------------|---|---|---|---|---|---|---|
| T4-BGT        | - | + | + | + | - | - | - |
| <i>Msp</i> I  | - | + | - | - | + | - | - |
| <i>Hpa</i> II | - | - | + | - | - | + | - |
| DNA           | - | + | + | + | + | + | + |

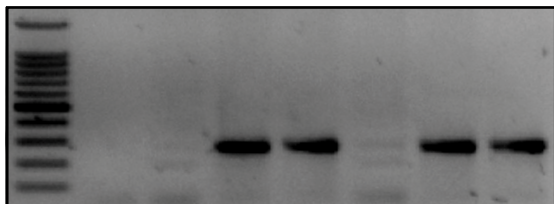

5hmC  
5hmC + 5mC  
Undigested DNA  
Fully digested  
5hmC + 5mC  
Undigested DNA

#### PL 70 - *FRMD3* region

|               |   |   |   |   |   |   |   |
|---------------|---|---|---|---|---|---|---|
| T4-BGT        | - | + | + | + | - | - | - |
| <i>Msp</i> I  | - | + | - | - | + | - | - |
| <i>Hpa</i> II | - | - | + | - | - | + | - |
| DNA           | - | + | + | + | + | + | + |

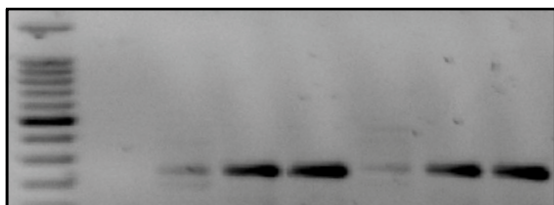

5hmC  
5hmC + 5mC  
Undigested DNA  
Fully digested  
5hmC + 5mC  
Undigested DNA

#### PL 50 - *KCNQ1* region (Note, not the KvDMR1)

|               |   |   |   |   |   |   |   |
|---------------|---|---|---|---|---|---|---|
| T4-BGT        | - | + | + | + | - | - | - |
| <i>Msp</i> I  | - | + | - | - | + | - | - |
| <i>Hpa</i> II | - | - | + | - | - | + | - |
| DNA           | - | + | + | + | + | + | + |

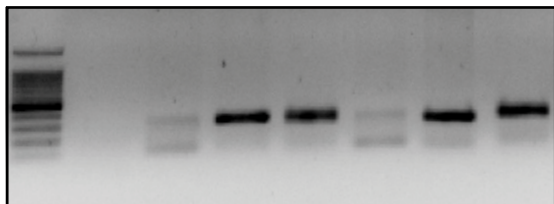

5hmC  
5hmC + 5mC  
Undigested DNA  
Fully digested  
5hmC + 5mC  
Undigested DNA

### B

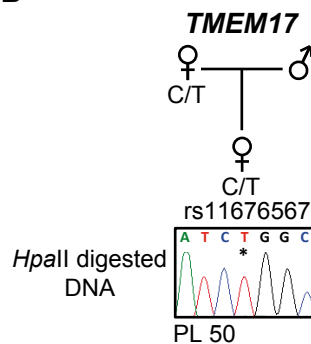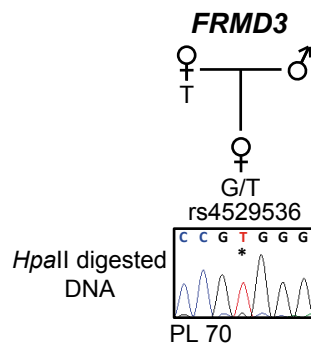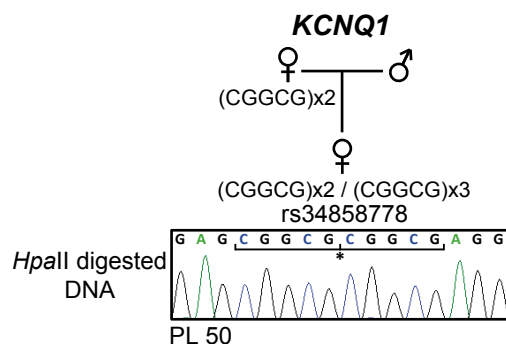

Supplement: pgen.1006427.s002.pdf [file pgen.1006427.s002.pdf]
