# Supplementary material for: Human Oocyte-Derived Methylation Differences Persist in the Placenta Revealing Widespread Transient Imprinting
Source: PubMed Central journal article supplement (PMC5106035; doi:10.1371/journal.pgen.1006427), 2016-11-11

**TMEM247**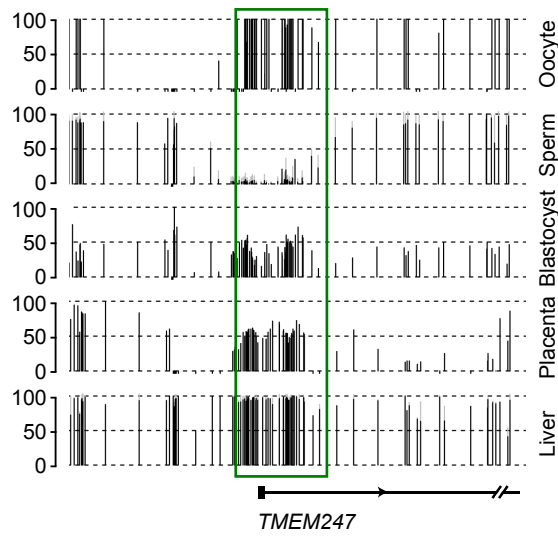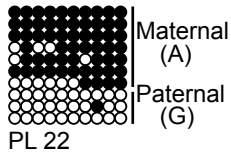**GPR1-AS**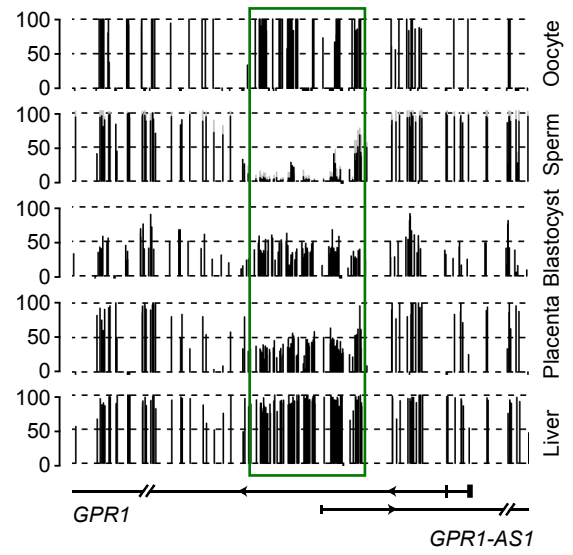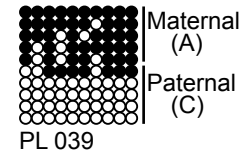**ZFAT**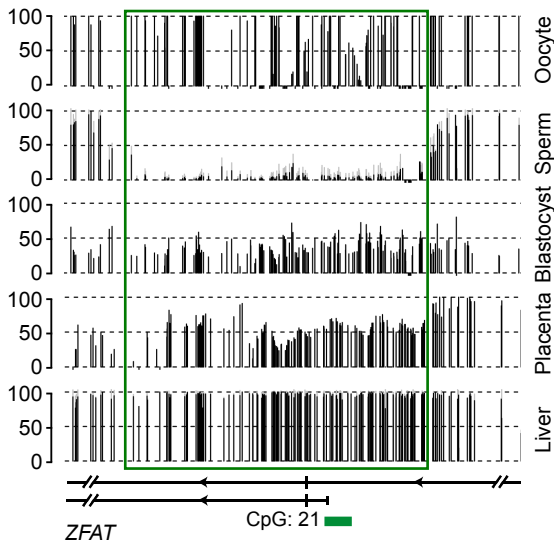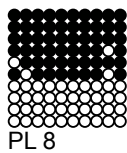**C19MC**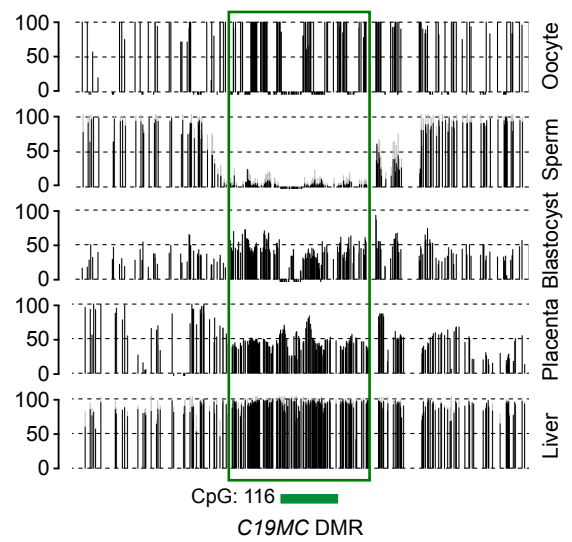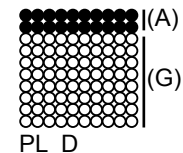

Supplement: pgen.1006427.s005.pdf [file pgen.1006427.s005.pdf]
